# Supplementary material for: A study on a natural pyrite sample as a potential reference material for simultaneous measurement of sulfur and iron isotopes using fs-LA-MC-ICP-MSs
Source: Royal Society of Chemistry journal article supplement (doi:10.1039/d3ja00351e), 2024-01-01
Supplement: d3ja00351e1.pdf [file d3ja00351e1.pdf]

## Supporting Information

### **A study on a natural pyrite sample as a potential reference material for simultaneous measurement of sulfur and iron isotopes using fs- LA-MC-ICP-MSs**

Lie-Wen Xie<sup>1,\*</sup>, Xiao-Jun Wang<sup>2</sup>, Hui-Min Yu<sup>3</sup>, Jian-Feng Gao<sup>4</sup>, Lei Xu<sup>1</sup>, Chao Huang<sup>1</sup>, Guo-Qiang Tang<sup>1</sup>, Qian Mao<sup>1</sup>, Lian-Jun Hong<sup>1</sup>, Yue-Heng Yang<sup>1</sup>, Shi-Tou Wu<sup>1</sup>, Hao Wang<sup>1</sup>

<sup>1</sup> *State Key Laboratory of Lithospheric Evolution, Institute of Geology and Geophysics, Chinese Academy of Sciences, P. O. Box 9825, Beijing 100029, P. R. China.*

<sup>2</sup> *State Key Laboratory of Continental Dynamics, Department of Geology, Northwest University, Xi'an 710069, P. R. China.*

<sup>3</sup> *CAS Key Laboratory of Crust-Mantle Materials and Environments, School of Earth and Space Sciences, University of Science and Technology of China, Hefei, China.*

<sup>4</sup> *State Key Laboratory of Ore Deposit Geochemistry, Institute of Geochemistry, Chinese Academy of Sciences, Guiyang, Guizhou, China*

\* Corresponding author

Email: xieliewen@mail.iggcas.ac.cn

Tel: +86-010-82998162, Fax: +86-010-62010846

**Submitted to *Journal of Analytical Atomic Spectrometry***

Table S1 Summary of the instrument parameters

| Faraday Cup Configurations for Fe isotopes on Neptune Plus and S isotopes on Neptune |                                                                                                                                      |    |                  |                                       |                                                                                                                                    |    |                  |                  |
|--------------------------------------------------------------------------------------|--------------------------------------------------------------------------------------------------------------------------------------|----|------------------|---------------------------------------|------------------------------------------------------------------------------------------------------------------------------------|----|------------------|------------------|
| L4                                                                                   | L3                                                                                                                                   | L2 | L1               | C                                     | H1                                                                                                                                 | H2 | H3               | H4               |
|                                                                                      | <sup>53</sup> Cr                                                                                                                     |    | <sup>54</sup> Fe | <sup>56</sup> Fe                      | <sup>57</sup> Fe                                                                                                                   |    | <sup>58</sup> Fe | <sup>60</sup> Ni |
|                                                                                      |                                                                                                                                      |    | <sup>32</sup> S  | <sup>33</sup> S                       | <sup>34</sup> S                                                                                                                    |    |                  |                  |
| <i>Neptune / Neptune Plus MC-ICP-MS</i>                                              |                                                                                                                                      |    |                  | <i>NWRFemto Laser Ablation System</i> |                                                                                                                                    |    |                  |                  |
| RF power                                                                             | 1200 W                                                                                                                               |    |                  | Wavelength                            | 257 nm                                                                                                                             |    |                  |                  |
| Plasma gas                                                                           | 16 L/min (Ar)                                                                                                                        |    |                  | Pulse duration                        | 70 ~ 90 fs                                                                                                                         |    |                  |                  |
| Auxiliary gas                                                                        | 0.9 L/min (Ar)                                                                                                                       |    |                  | Energy density                        | Approximate 0.1 J/cm <sup>2</sup> at energy output of 5% for Fe and S isotope ratio analysis                                       |    |                  |                  |
| Sample depth                                                                         | About -0.6 ~ -1.2 mm                                                                                                                 |    |                  | Beam size                             | 25 ~ 30 μm and 40 μm for Fe and S isotope ratio analysis, respectively, and 60 μm for simultaneous measurements of Fe-S isotopes   |    |                  |                  |
| Interface cones                                                                      | Sample cone: standard cone<br>Skimmer cone: X cone                                                                                   |    |                  |                                       |                                                                                                                                    |    |                  |                  |
| Make up gas                                                                          | About 0.80 ~ 1.3 L/min (Ar)                                                                                                          |    |                  | Pulse repeat rate                     | 3 ~ 8 Hz and 10 ~ 15 Hz for Fe and S isotope ratio analysis, respectively and 20 Hz for simultaneous measurements of Fe-S isotopes |    |                  |                  |
| Resolution                                                                           | High resolution mode<br>(m/Δm ~8000-9000)                                                                                            |    |                  |                                       |                                                                                                                                    |    |                  |                  |
| Integration                                                                          | A single analysis consists of a block of 60 cycles with an integration time of 0.262 s per cycle for Fe and S isotope ratio analysis |    |                  | Carrier gas (He)                      | About 700 mL/min for Fe and S isotope ratio analysis and about 900 mL/min for simultaneous measurements of Fe-S isotopes           |    |                  |                  |

Table S2 Element concentrations (wt%) of IGGPy-1 by EPMA

| Spot No. | Grain No. | Element concentration (wt%) |      |      |      |      |      |      |      |       |
|----------|-----------|-----------------------------|------|------|------|------|------|------|------|-------|
|          |           | Fe                          | S    | Co   | Ni   | Cu   | Zn   | As   | Pb   | Total |
| 1        | IGGPy G01 | 46.2                        | 52.1 | 1.47 | 0.03 | -    | 0.03 | -    | 0.09 | 99.9  |
| 2        | IGGPy G02 | 46.0                        | 51.7 | 1.46 | -    | -    | 0.03 | -    | 0.06 | 99.3  |
| 3        | IGGPy G03 | 46.3                        | 52.0 | 1.47 | 0.03 | -    | -    | -    | 0.10 | 99.9  |
| 4        | IGGPy G04 | 46.1                        | 51.9 | 1.48 | -    | -    | -    | -    | 0.09 | 99.6  |
| 5        | IGGPy G05 | 46.2                        | 52.2 | 1.48 | -    | -    | -    | -    | 0.07 | 99.9  |
| 6        | IGGPy G06 | 46.2                        | 52.3 | 1.45 | -    | 0.03 | -    | 0.05 | 0.07 | 100.1 |
| 7        | IGGPy G07 | 46.3                        | 52.6 | 1.48 | -    | -    | -    | 0.03 | -    | 100.4 |
| 8        | IGGPy G08 | 46.2                        | 51.9 | 1.48 | -    | -    | -    | -    | 0.09 | 99.8  |
| 9        | IGGPy G09 | 46.5                        | 52.1 | 1.49 | -    | -    | -    | 0.03 | 0.07 | 100.2 |
| 10       | IGGPy G10 | 46.4                        | 52.0 | 1.48 | -    | -    | -    | -    | 0.11 | 100.0 |
| 11       | IGGPy G11 | 46.3                        | 52.0 | 1.47 | 0.02 | -    | -    | -    | 0.07 | 99.9  |
| 12       | IGGPy G12 | 46.3                        | 51.5 | 1.47 | -    | -    | -    | -    | 0.06 | 99.3  |
|          | average   | 46.3                        | 52.0 | 1.47 |      |      |      |      | 0.07 | 99.9  |
|          | 1S        | 0.1                         | 0.3  | 0.01 |      |      |      |      | 0.02 | 0.3   |
| 13       | IGGPy G13 | 46.0                        | 51.7 | 1.49 | -    | -    | -    | 0.03 | 0.10 | 99.3  |
| 14       |           | 46.0                        | 51.7 | 1.48 | 0.02 | -    | -    | -    | 0.03 | 99.3  |
| 15       |           | 46.2                        | 52.0 | 1.47 | -    | -    | -    | -    | 0.10 | 99.7  |
| 16       |           | 46.1                        | 51.7 | 1.49 | 0.02 | -    | -    | -    | 0.09 | 99.4  |
| 17       |           | 46.2                        | 51.8 | 1.45 | -    | -    | 0.03 | -    | 0.11 | 99.6  |
| 18       |           | 46.0                        | 51.9 | 1.49 | -    | -    | -    | 0.02 | -    | 99.5  |
| 19       |           | 46.1                        | 51.9 | 1.47 | 0.02 | -    | -    | -    | 0.08 | 99.5  |
| 20       |           | 46.2                        | 51.7 | 1.46 | -    | -    | -    | -    | 0.13 | 99.6  |
| 21       |           | 46.1                        | 51.8 | 1.45 | 0.03 | -    | -    | 0.02 | 0.12 | 99.5  |
| 22       |           | 46.1                        | 51.6 | 1.48 | -    | -    | -    | 0.02 | 0.08 | 99.3  |
| 23       |           | 46.3                        | 51.9 | 1.48 | -    | -    | -    | -    | 0.01 | 99.7  |
| 24       |           | 45.9                        | 51.5 | 1.47 | -    | -    | -    | 0.03 | 0.09 | 99.1  |
| 25       |           | 46.3                        | 51.8 | 1.48 | -    | -    | -    | 0.02 | 0.07 | 99.7  |
| 26       |           | 46.1                        | 51.6 | 1.44 | -    | 0.03 | -    | 0.02 | 0.08 | 99.3  |
| 27       |           | 46.1                        | 51.5 | 1.46 | -    | -    | -    | 0.03 | 0.08 | 99.2  |
| 28       |           | 46.2                        | 51.5 | 1.47 | -    | -    | -    | 0.03 | 0.07 | 99.3  |
| 29       |           | 46.0                        | 51.6 | 1.46 | 0.04 | -    | -    | -    | 0.10 | 99.2  |
| 30       |           | 46.3                        | 51.7 | 1.47 | -    | -    | -    | -    | 0.07 | 99.6  |
| 31       |           | 46.2                        | 51.6 | 1.44 | -    | -    | -    | 0.02 | 0.07 | 99.4  |
| 32       |           | 46.0                        | 51.9 | 1.44 | 0.03 | 0.02 | -    | -    | 0.04 | 99.5  |
| 33       |           | 46.1                        | 51.8 | 1.47 | -    | 0.03 | -    | 0.03 | 0.10 | 99.5  |
| 34       |           | 46.1                        | 51.9 | 1.47 | 0.02 | -    | -    | 0.03 | -    | 99.6  |
| 35       |           | 46.2                        | 51.7 | 1.46 | -    | -    | -    | 0.05 | 0.07 | 99.5  |
| 36       |           | 46.0                        | 51.8 | 1.47 | -    | -    | 0.03 | 0.02 | 0.06 | 99.5  |
| 37       |           | 46.2                        | 51.8 | 1.47 | -    | -    | -    | 0.02 | -    | 99.5  |

Table S2 continued

|    |           |      |      |      |      |      |      |      |      |       |
|----|-----------|------|------|------|------|------|------|------|------|-------|
| 38 |           | 46.2 | 52.0 | 1.48 | 0.02 | -    | -    | -    | -    | 99.8  |
| 39 |           | 46.1 | 52.0 | 1.48 | -    | -    | -    | -    | 0.05 | 99.7  |
| 40 |           | 46.1 | 52.0 | 1.46 | -    | -    | -    | -    | 0.07 | 99.7  |
| 41 |           | 45.9 | 51.9 | 1.45 | -    | -    | -    | -    | 0.11 | 99.4  |
| 42 |           | 46.2 | 51.8 | 1.48 | -    | -    | -    | 0.02 | 0.06 | 99.6  |
| 43 |           | 46.1 | 51.9 | 1.46 | -    | -    | -    | -    | 0.08 | 99.5  |
| 44 |           | 46.2 | 52.0 | 1.48 | 0.02 | -    | 0.03 | -    | 0.05 | 99.8  |
| 45 |           | 46.2 | 52.1 | 1.47 | -    | -    | -    | -    | 0.05 | 99.9  |
| 46 |           | 46.0 | 52.0 | 1.48 | 0.02 | -    | -    | 0.03 | 0.07 | 99.6  |
| 47 |           | 46.2 | 51.9 | 1.49 | -    | 0.04 | -    | 0.02 | 0.09 | 99.8  |
| 48 |           | 46.1 | 51.7 | 1.48 | 0.02 | 0.02 | -    | 0.03 | -    | 99.4  |
| 49 |           | 46.1 | 52.0 | 1.45 | -    | -    | -    | 0.04 | 0.07 | 99.7  |
| 50 |           | 46.0 | 51.8 | 1.46 | -    | -    | -    | -    | 0.10 | 99.3  |
| 51 |           | 46.3 | 52.2 | 1.45 | 0.03 | -    | -    | 0.02 | 0.09 | 100.0 |
| 52 |           | 46.1 | 51.9 | 1.46 | -    | -    | 0.05 | 0.02 | -    | 99.6  |
| 53 |           | 46.0 | 51.8 | 1.45 | -    | -    | -    | -    | 0.06 | 99.3  |
| 54 |           | 46.3 | 52.0 | 1.46 | -    | 0.02 | -    | -    | 0.05 | 99.8  |
| 55 |           | 46.0 | 51.9 | 1.46 | 0.02 | -    | -    | 0.02 | 0.10 | 99.5  |
| 56 |           | 46.5 | 52.1 | 1.48 | -    | -    | -    | 0.03 | 0.10 | 100.2 |
| 57 |           | 46.0 | 52.1 | 1.45 | -    | -    | -    | 0.02 | 0.04 | 99.6  |
| 58 |           | 46.2 | 52.0 | 1.46 | 0.03 | 0.02 | -    | -    | 0.04 | 99.8  |
| 59 |           | 46.2 | 52.0 | 1.47 | 0.02 | -    | -    | 0.03 | 0.08 | 99.8  |
| 60 |           | 46.1 | 52.2 | 1.46 | -    | 0.02 | -    | -    | 0.09 | 99.9  |
| 61 |           | 46.2 | 52.0 | 1.46 | -    | -    | -    | 0.02 | 0.05 | 99.7  |
| 62 |           | 46.2 | 52.3 | 1.46 | -    | -    | -    | -    | 0.04 | 100.0 |
|    | average   | 46.1 | 51.9 | 1.47 |      |      |      |      | 0.07 | 99.6  |
|    | 1S        | 0.1  | 0.2  | 0.01 |      |      |      |      | 0.03 | 0.2   |
| 63 | IGGPy G14 | 46.3 | 52.0 | 1.47 | -    | -    | -    | -    | 0.09 | 99.8  |
| 64 |           | 46.2 | 51.9 | 1.45 | -    | -    | -    | -    | 0.11 | 99.7  |
| 65 |           | 46.3 | 52.0 | 1.46 | -    | -    | -    | -    | 0.14 | 99.9  |
| 66 |           | 46.1 | 51.9 | 1.48 | -    | -    | -    | -    | 0.07 | 99.6  |
| 67 |           | 46.3 | 52.2 | 1.48 | -    | -    | -    | 0.03 | 0.05 | 100.1 |
| 68 |           | 46.0 | 52.1 | 1.45 | -    | -    | -    | -    | 0.08 | 99.7  |
| 69 |           | 46.2 | 51.9 | 1.47 | -    | -    | -    | -    | 0.05 | 99.5  |
| 70 |           | 46.2 | 52.0 | 1.46 | 0.02 | -    | -    | -    | 0.09 | 99.7  |
| 71 |           | 46.0 | 52.1 | 1.46 | -    | -    | -    | 0.02 | 0.05 | 99.7  |
| 72 |           | 46.3 | 52.3 | 1.45 | -    | -    | -    | -    | 0.06 | 100.1 |
| 73 |           | 46.2 | 52.1 | 1.47 | -    | -    | -    | -    | -    | 99.8  |
| 74 |           | 46.3 | 52.1 | 1.46 | -    | -    | -    | 0.02 | 0.05 | 99.9  |
| 75 |           | 46.5 | 52.1 | 1.47 | -    | 0.03 | -    | 0.03 | 0.06 | 100.2 |
| 76 |           | 46.2 | 52.0 | 1.45 | -    | -    | -    | -    | 0.06 | 99.7  |

Table S2 continued

|     |         |      |      |      |      |      |      |      |       |
|-----|---------|------|------|------|------|------|------|------|-------|
| 77  | 46.1    | 52.1 | 1.47 | 0.02 | -    | -    | 0.02 | 0.04 | 99.8  |
| 78  | 46.2    | 51.9 | 1.46 | -    | -    | -    | 0.02 | 0.09 | 99.7  |
| 79  | 46.4    | 52.3 | 1.47 | -    | -    | -    | 0.03 | 0.05 | 100.2 |
| 80  | 45.9    | 52.0 | 1.47 | -    | -    | -    | -    | 0.07 | 99.5  |
| 81  | 46.3    | 52.1 | 1.48 | 0.02 | -    | -    | 0.04 | 0.07 | 100.0 |
| 82  | 46.3    | 52.1 | 1.46 | -    | -    | 0.05 | -    | 0.08 | 100.0 |
| 83  | 46.1    | 52.0 | 1.47 | -    | -    | -    | -    | 0.05 | 99.7  |
| 84  | 46.1    | 52.1 | 1.48 | -    | -    | -    | 0.02 | 0.05 | 99.8  |
| 85  | 46.2    | 52.2 | 1.46 | -    | -    | -    | -    | -    | 99.8  |
| 86  | 46.2    | 52.0 | 1.48 | -    | -    | -    | 0.02 | 0.05 | 99.8  |
| 87  | 46.0    | 51.9 | 1.46 | -    | -    | -    | 0.05 | 0.07 | 99.5  |
| 88  | 46.4    | 52.0 | 1.48 | 0.02 | -    | -    | 0.03 | 0.12 | 100.0 |
| 89  | 46.4    | 52.3 | 1.48 | -    | -    | -    | 0.02 | 0.05 | 100.2 |
| 90  | 46.2    | 52.3 | 1.48 | -    | -    | -    | -    | 0.07 | 100.1 |
| 91  | 46.1    | 52.0 | 1.46 | 0.02 | -    | 0.03 | -    | 0.07 | 99.8  |
| 92  | 46.3    | 52.0 | 1.47 | -    | -    | -    | -    | 0.10 | 99.9  |
| 93  | 46.1    | 52.2 | 1.47 | -    | 0.02 | -    | 0.04 | 0.06 | 99.9  |
| 94  | 46.3    | 52.2 | 1.46 | -    | -    | -    | 0.02 | 0.05 | 100.0 |
| 95  | 46.2    | 52.1 | 1.46 | -    | -    | -    | 0.03 | 0.07 | 99.9  |
| 96  | 46.2    | 52.1 | 1.44 | -    | -    | -    | -    | 0.09 | 99.8  |
| 97  | 46.3    | 52.1 | 1.47 | 0.02 | -    | -    | -    | 0.09 | 100.0 |
| 98  | 45.9    | 52.1 | 1.46 | -    | -    | -    | -    | 0.06 | 99.6  |
| 99  | 46.0    | 52.1 | 1.47 | -    | 0.02 | -    | -    | 0.05 | 99.7  |
| 100 | 46.1    | 52.1 | 1.46 | -    | -    | -    | -    | -    | 99.7  |
| 101 | 46.0    | 52.2 | 1.45 | 0.02 | -    | -    | 0.02 | 0.05 | 99.8  |
| 102 | 46.2    | 52.2 | 1.46 | 0.02 | -    | -    | 0.02 | 0.05 | 99.9  |
|     | average | 46.2 | 52.1 | 1.47 |      |      |      | 0.06 | 99.8  |
|     | 1S      | 0.1  | 0.1  | 0.01 |      |      |      | 0.03 | 0.2   |

'-' indicates 'Not detected'.

Table S3 Position effects within a TV2 cell on iron and sulfur isotope composition measurement

| Sample No.                                | $\delta^{34}\text{S}_1$<br>to 5 <sup>†</sup> | $\delta^{56}\text{Fe}_1$<br>to 5 <sup>†</sup> | $\delta^{34}\text{S}_2$<br>to 5 <sup>†</sup> | $\delta^{56}\text{Fe}_2$<br>to 5 <sup>†</sup> | $\delta^{34}\text{S}_3$<br>to 5 <sup>†</sup> | $\delta^{56}\text{Fe}_3$<br>to 5 <sup>†</sup> | $\delta^{34}\text{S}_4$<br>to 5 <sup>†</sup> | $\delta^{56}\text{Fe}_4$<br>to 5 <sup>†</sup> | $\delta^{34}\text{S}_6$<br>to 5 <sup>†</sup> | $\delta^{56}\text{Fe}_6$<br>to 5 <sup>†</sup> |
|-------------------------------------------|----------------------------------------------|-----------------------------------------------|----------------------------------------------|-----------------------------------------------|----------------------------------------------|-----------------------------------------------|----------------------------------------------|-----------------------------------------------|----------------------------------------------|-----------------------------------------------|
| 1                                         | 0.12                                         | 0.24                                          | 0.00                                         | 0.01                                          | -0.09                                        | 0.06                                          | 0.14                                         | 0.19                                          | -0.02                                        | 0.05                                          |
| 2                                         | -0.03                                        | 0.25                                          | 0.07                                         | -0.07                                         | -0.12                                        | 0.14                                          | 0.11                                         | 0.08                                          | -0.08                                        | -0.01                                         |
| 3                                         | 0.01                                         | 0.23                                          | -0.01                                        | 0.02                                          | 0.00                                         | 0.09                                          | 0.05                                         | 0.22                                          | 0.06                                         | -0.02                                         |
| 4                                         | -0.04                                        | 0.17                                          | 0.10                                         | 0.09                                          | -0.03                                        | 0.06                                          | 0.03                                         | 0.24                                          | 0.12                                         | -0.05                                         |
| 5                                         | -0.01                                        | 0.11                                          | 0.08                                         | 0.00                                          | 0.02                                         | 0.05                                          | 0.01                                         | 0.19                                          | 0.14                                         | 0.04                                          |
| 6                                         | 0.04                                         | 0.17                                          | -0.01                                        | -0.03                                         | -0.06                                        | 0.05                                          | 0.02                                         | 0.32                                          | 0.11                                         | 0.06                                          |
| 7                                         | -0.02                                        | 0.28                                          | -0.06                                        | 0.10                                          | -0.09                                        | 0.04                                          | 0.07                                         | 0.17                                          | -0.03                                        | 0.04                                          |
| 8                                         | -0.04                                        | 0.29                                          | 0.07                                         | 0.04                                          | -0.09                                        | 0.08                                          | 0.06                                         | 0.09                                          | 0.02                                         | -0.03                                         |
| 9                                         | -0.03                                        | 0.16                                          | 0.02                                         | -0.07                                         | -0.11                                        | 0.03                                          | 0.11                                         | 0.22                                          | -0.07                                        | -0.10                                         |
| 10                                        | -0.13                                        | 0.16                                          | -0.10                                        | -0.08                                         | -0.17                                        | 0.00                                          | 0.01                                         | 0.09                                          | 0.06                                         | -0.02                                         |
| 11                                        | -0.19                                        | 0.19                                          | 0.01                                         | -0.01                                         | -0.21                                        | 0.04                                          | 0.10                                         | 0.17                                          | 0.11                                         | -0.03                                         |
| 12                                        | -0.14                                        | 0.16                                          | 0.11                                         | -0.05                                         | -0.06                                        | 0.17                                          | 0.03                                         | 0.24                                          | 0.07                                         | 0.12                                          |
| 13                                        | -0.05                                        | 0.06                                          | -0.03                                        | -0.13                                         | -0.04                                        | 0.10                                          | 0.00                                         | 0.10                                          | -0.01                                        | 0.10                                          |
| 14                                        | -0.13                                        | 0.17                                          | -0.02                                        | -0.10                                         | -0.05                                        | 0.09                                          | 0.05                                         | 0.23                                          | -0.08                                        | 0.00                                          |
| 15                                        | -0.23                                        | 0.14                                          | -0.01                                        | -0.05                                         | -0.05                                        | 0.16                                          | 0.07                                         | 0.22                                          | 0.17                                         | -0.10                                         |
| 16                                        | -0.24                                        | 0.07                                          | 0.06                                         | -0.08                                         | -0.08                                        | 0.17                                          | 0.00                                         | 0.25                                          | 0.00                                         | -0.07                                         |
| 17                                        | -0.22                                        | 0.16                                          | 0.04                                         | 0.00                                          | -0.14                                        | 0.16                                          | -0.01                                        | 0.14                                          | 0.01                                         | -0.04                                         |
| 18                                        | -0.27                                        | 0.16                                          | 0.02                                         | 0.00                                          | -0.09                                        | 0.17                                          | -0.02                                        | 0.20                                          | 0.07                                         | 0.08                                          |
| average                                   | -0.09                                        | 0.18                                          | 0.02                                         | -0.02                                         | -0.08                                        | 0.09                                          | 0.05                                         | 0.19                                          | 0.04                                         | 0.00                                          |
| 2S                                        | 0.22                                         | 0.13                                          | 0.11                                         | 0.12                                          | 0.11                                         | 0.11                                          | 0.09                                         | 0.13                                          | 0.15                                         | 0.13                                          |
| * <i>t</i>                                | 3.34                                         | 11.31                                         | 1.44                                         | 1.58                                          | 6.00                                         | 6.62                                          | 4.20                                         | 11.58                                         | 1.92                                         | 0.12                                          |
| <sup>‡</sup> <i>t</i> <sub>critical</sub> | 2.11                                         |                                               |                                              |                                               |                                              |                                               |                                              |                                               |                                              |                                               |

<sup>†</sup>:  $\delta^{34}\text{S}_{x \text{ to } 5}$  and  $\delta^{56}\text{Fe}_{x \text{ to } 5}$  ( $x = 1, 2, 3, 4$  and  $6$ , respectively) were the deviations per mil of sulfur and iron isotope composition measured for IGGPy-1 pyrite on the position  $x$  relative to that on position 5, respectively.

\*:  $t$  values calculated using the formula:  $t = \frac{|\bar{x} - \mu|}{S} \sqrt{n}$ . Here,  $\bar{x}$  is the mean of the deviation in iron or sulfur isotopic compositions measured in position 1, 2, 3, 4 and 6, respectively, calibrated against that measured in position 5;  $S$  is the standard deviation;  $n$  is the number of the values.  $\mu$  represents the population of the deviations in iron or sulfur isotopic composition measured in position 1, 2, 3, 4 and 6, respectively. if the measurements on iron or sulfur isotopic composition were not influenced by position effects and only random error occurs, then  $\mu = 0$ .

<sup>‡</sup>:  $t_{critical}$  values calculated using T.INV.2T function (two-tailed hypothesis) in Excel at the significance level of 0.05 and the freedom degree of 17.

Table S4 Matrix effects between IGGPo-1 and IGGPpy-1 on Fe and S isotope measurement

| Applied technique              | fs-LA-MC-ICP-MS                     | fs-LA-MC-ICP-MS                          |
|--------------------------------|-------------------------------------|------------------------------------------|
| Analytical No.                 | $\delta^{34}\text{S}_{\text{VCDT}}$ | $\delta^{56}\text{Fe}_{\text{IRMM-014}}$ |
| 1                              | 0.43                                | -2.31                                    |
| 2                              | 0.46                                | -2.29                                    |
| 3                              | 0.66                                | -2.28                                    |
| 4                              | 0.64                                | -2.27                                    |
| 5                              | 0.58                                | -2.24                                    |
| 6                              | 0.56                                | -2.18                                    |
| 7                              | 0.50                                | -2.22                                    |
| 8                              | 0.39                                | -2.20                                    |
| 9                              | 0.61                                | -2.15                                    |
| 10                             | 0.58                                | -2.20                                    |
| 11                             | 0.51                                | -2.14                                    |
| 12                             | 0.65                                | -2.25                                    |
| 13                             | 0.52                                | -2.20                                    |
| 14                             | 0.34                                | -2.15                                    |
| 15                             | 0.48                                | -2.29                                    |
| 16                             | 0.54                                | -2.25                                    |
| 17                             | 0.55                                | -2.17                                    |
| 18                             | 0.53                                | -2.12                                    |
| 19                             | 0.40                                | -2.08                                    |
| 20                             | 0.34                                | -2.20                                    |
| average                        | 0.51                                | -2.21                                    |
| 2S                             | 0.20                                | 0.12                                     |
| $\dagger t$                    | 47.14                               | 56.69                                    |
| $\ddagger t_{\text{critical}}$ | 2.09                                | 2.09                                     |
| Applied technique              | EA-IRMS                             | SN-MC-ICPMS                              |
| average                        | -0.52                               | -1.43                                    |
| 2S                             | 0.30                                | 0.06                                     |
| N                              | 2                                   | 3                                        |

$\dagger$ :  $t$  values calculated using the formula:  $t = \frac{|\bar{x} - \mu|}{S} \sqrt{n}$ . Here,  $\bar{x}$  is the mean of the deviation values in iron (or sulfur) isotopic composition measured of IGGPo-1 pyrrhotite calibrated against IGGPpy-1 pyrite;  $S$  is the standard deviation;  $n$  is the number of the values.  $\mu$  represents the population of deviations in iron (or sulfur) isotopic composition, if the isotopic measurements were not influenced by matrix effects and only random error occurs, then  $\mu$  should be near to iron (or sulfur) isotopic reference value obtained by SN-MC-ICP-MS (or EA-IRMS).

$\ddagger$ :  $t_{\text{critical}}$  values calculated using T.INV.2T function (two-tailed hypothesis) in Excel at the significance level of 0.05 and the freedom degree of 19.

Table S5 The results of simultaneous measurement of Fe and S isotopic compositions

| Sample | Analysis#     | $\delta^{56}\text{Fe}_{\text{IRRM014}}$                                 | $\delta^{57}\text{Fe}_{\text{IRRM014}}$ | $\delta^{34}\text{S}_{\text{VCDT}}$ | Description                                                                                        |
|--------|---------------|-------------------------------------------------------------------------|-----------------------------------------|-------------------------------------|----------------------------------------------------------------------------------------------------|
| 12744a | <b>Test 1</b> | Ablated material proportion of 5:1 used for measuring S and Fe isotopes |                                         |                                     |                                                                                                    |
|        | 1             | 0.38                                                                    | 0.59                                    | 2.85                                |                                                                                                    |
|        | 2             | 0.47                                                                    | 0.69                                    | 2.71                                | Signal intensities of $^{56}\text{Fe}$ and $^{32}\text{S}$ were about 10 V and 24 V, respectively. |
|        | 3             | 0.43                                                                    | 0.60                                    | 2.78                                |                                                                                                    |
|        | 4             | 0.52                                                                    | 0.65                                    | 2.76                                |                                                                                                    |
|        | 5             | 0.37                                                                    | 0.58                                    | 2.75                                |                                                                                                    |
|        | 6             | 0.38                                                                    | 0.49                                    | 2.69                                |                                                                                                    |
|        | 7             | 0.29                                                                    | 0.39                                    | 2.61                                |                                                                                                    |
|        | 8             | 0.28                                                                    | 0.34                                    | 2.67                                |                                                                                                    |
|        | 9             | 0.34                                                                    | 0.33                                    | 2.81                                |                                                                                                    |
|        | 10            | 0.35                                                                    | 0.51                                    | 2.77                                |                                                                                                    |
|        | 11            | 0.32                                                                    | 0.60                                    | 2.73                                |                                                                                                    |
|        | Average       | 0.37                                                                    | 0.52                                    | 2.74                                |                                                                                                    |
|        | 2S            | 0.15                                                                    | 0.25                                    | 0.13                                |                                                                                                    |
|        | <b>Test 2</b> | Ablated material proportion of 3:1 used for measuring S and Fe isotopes |                                         |                                     |                                                                                                    |
|        | 12            | 0.38                                                                    | 0.49                                    | 2.74                                |                                                                                                    |
|        | 13            | 0.40                                                                    | 0.45                                    | 2.81                                | Signal intensities of $^{56}\text{Fe}$ and $^{32}\text{S}$ were about 18 V and 20 V, respectively. |
|        | 14            | 0.45                                                                    | 0.51                                    | 2.52                                |                                                                                                    |
|        | 15            | 0.41                                                                    | 0.68                                    | 2.69                                |                                                                                                    |
|        | 16            | 0.34                                                                    | 0.55                                    | 2.76                                |                                                                                                    |
|        | 17            | 0.41                                                                    | 0.64                                    | 2.72                                |                                                                                                    |
|        | 18            | 0.39                                                                    | 0.52                                    | 2.83                                |                                                                                                    |
|        | 19            | 0.36                                                                    | 0.58                                    | 2.68                                |                                                                                                    |
|        | 20            | 0.38                                                                    | 0.48                                    | 2.70                                |                                                                                                    |
|        | 21            | 0.38                                                                    | 0.68                                    | 2.74                                |                                                                                                    |
|        | 22            | 0.40                                                                    | 0.46                                    | 2.76                                |                                                                                                    |
|        | average       | 0.39                                                                    | 0.55                                    | 2.72                                |                                                                                                    |
|        | 2S            | 0.06                                                                    | 0.17                                    | 0.17                                |                                                                                                    |
|        | <b>Test 3</b> | Ablated material proportion of 3:2 used for measuring S and Fe isotopes |                                         |                                     |                                                                                                    |
|        | 23            | 0.57                                                                    | 0.76                                    | 2.85                                |                                                                                                    |
|        | 24            | 0.49                                                                    | 0.79                                    | 2.77                                | Signal intensities of $^{56}\text{Fe}$ and $^{32}\text{S}$ were about 32 V and 18 V, respectively. |
|        | 25            | 0.49                                                                    | 0.69                                    | 2.89                                |                                                                                                    |
|        | 26            | 0.44                                                                    | 0.65                                    | 2.83                                |                                                                                                    |
|        | 27            | 0.45                                                                    | 0.72                                    | 2.85                                |                                                                                                    |
|        | 28            | 0.40                                                                    | 0.59                                    | 2.92                                |                                                                                                    |
|        | 29            | 0.46                                                                    | 0.68                                    | 3.02                                |                                                                                                    |
|        | 30            | 0.47                                                                    | 0.69                                    | 2.89                                |                                                                                                    |
|        | 31            | 0.43                                                                    | 0.66                                    | 2.89                                |                                                                                                    |
|        | 32            | 0.50                                                                    | 0.85                                    | 2.85                                |                                                                                                    |
|        | 33            | 0.53                                                                    | 0.85                                    | 2.88                                |                                                                                                    |
|        | average       | 0.47                                                                    | 0.72                                    | 2.88                                |                                                                                                    |
|        | 2S            | 0.10                                                                    | 0.17                                    | 0.12                                |                                                                                                    |
